# Supplementary material for: Co-electrodeposition of RuO2–MnO2nanowires and the contribution of RuO2to the capacitance increase
Source: Royal Society of Chemistry journal article supplement (doi:10.1039/c5cp01814e), 2015-01-01
Supplement: c5cp01814e1.pdf [file c5cp01814e1.pdf]

## Electronic Supporting Information

:

Co-electrodeposition of RuO<sub>2</sub>-MnO<sub>2</sub> nanowires and the contribution of RuO<sub>2</sub> to the capacitance increase

Zhe Gui, Eleanor Gillette, Jonathon Duay, Junkai Hu, Nam Kim and Sang Bok Lee\*

Department of Chemistry and Biochemistry, University of Maryland, College Park, MD 20740, USA.

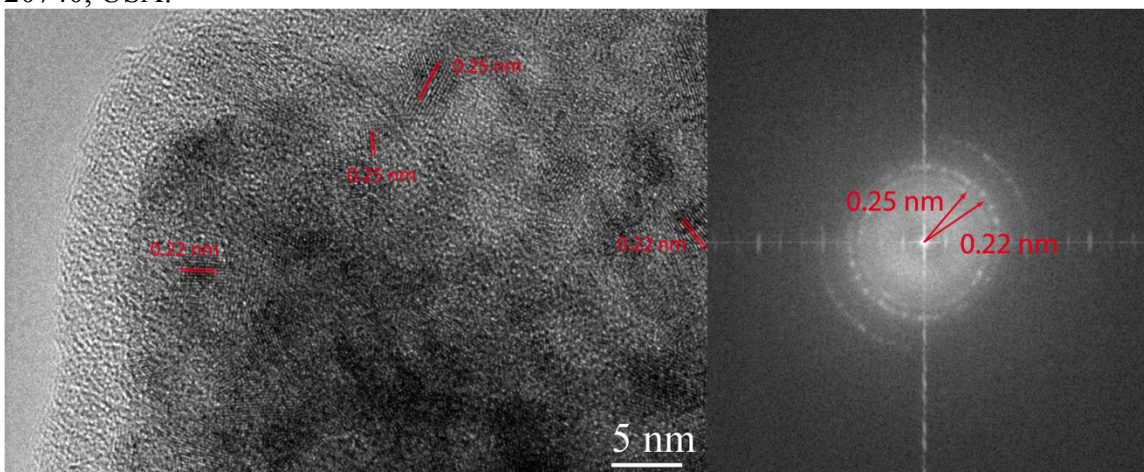

**Figure S11.** TEM image of the RuO<sub>2</sub>-MnO<sub>2</sub> with d-space measured and marked on the TEM images. The corresponding FFT resolved image is shown on the right, same result of d space values are obtained here.

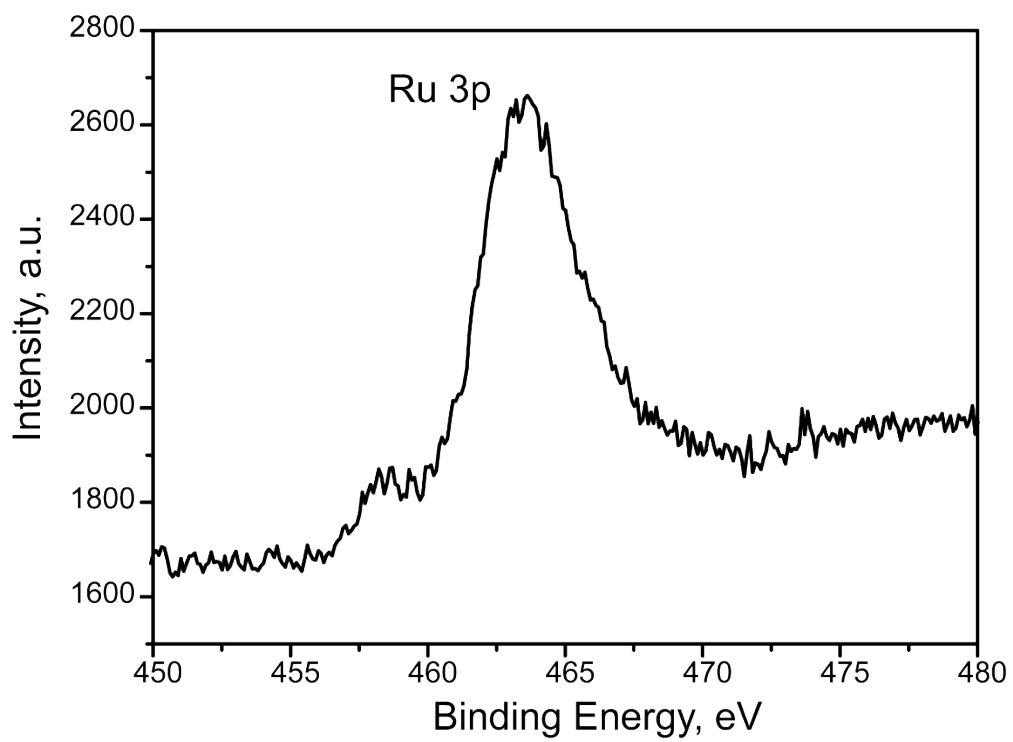

**Figure SI2.** XPS spectra for Ru 3p in the RuO<sub>2</sub>-MnO<sub>2</sub>

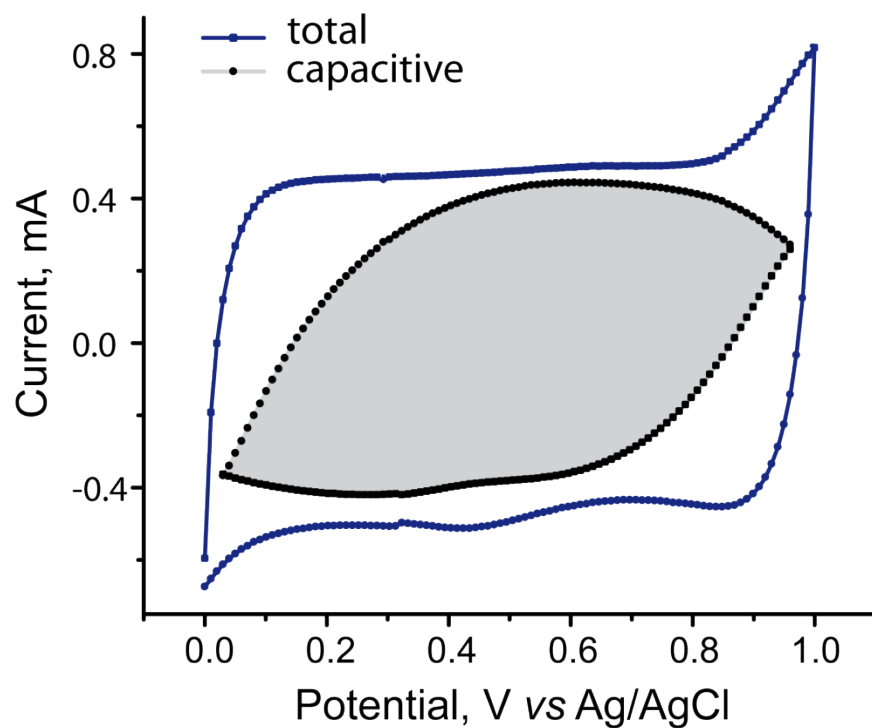

**Figure SI3.** Voltammetric response at 20 mV/s for the pristine MnO<sub>2</sub> nanowires. The total current (blue curve) is obtained experimentally. The capacitive currents (black curve in gray shadow) are deconvoluted by the Dunn's method. The capacitive capacitance is calculated based on the quantified capacitive voltammetry curve. And the insertion capacitance is derived by the difference between the total and capacitive capacitance.
